# Supplementary material for: A novel immunotherapy of Brucellosis in cows monitored non invasively through a specific biomarker
Source: PLOS journal article supplement (doi:10.1371/journal.pntd.0006393), 2018-04-11
Supplement: S3 (10.1371/journal.pntd.0006393.s003) [file journal.pntd.0006393.s003]

**A Novel Immunotherapy of Brucellosis in Cows Monitored Non Invasively Through a Specific Biomarker**

***Hari Mohan Saxena and Sugandha Raj***

**Supplementary information**


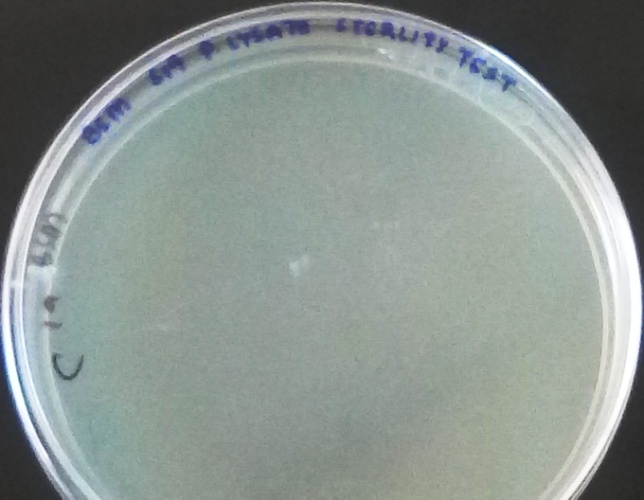

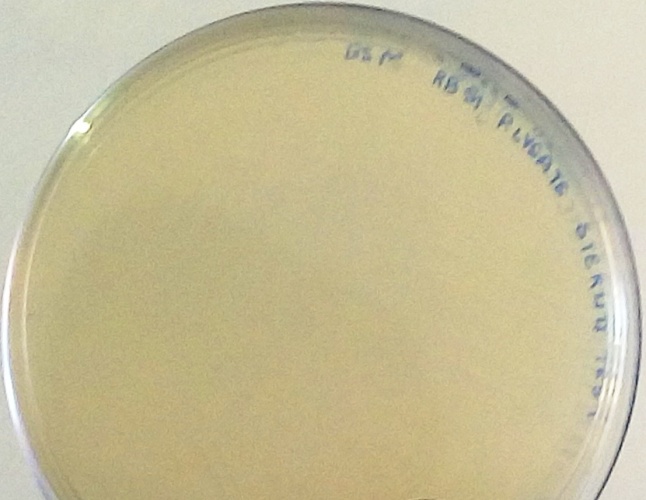


**S3 Fig. Sterility test of lysates (left: S19 and right: RB51) showing no growth of organisms**
